# Supplementary material for: Copy number variation and evolution in humans and chimpanzees
Source: HighWire-hosted journal article supplement (doi:10.1101/gr.082016.108), 2008-09-04
Supplement: SuppFig1.pdf [file SuppFig1.pdf]

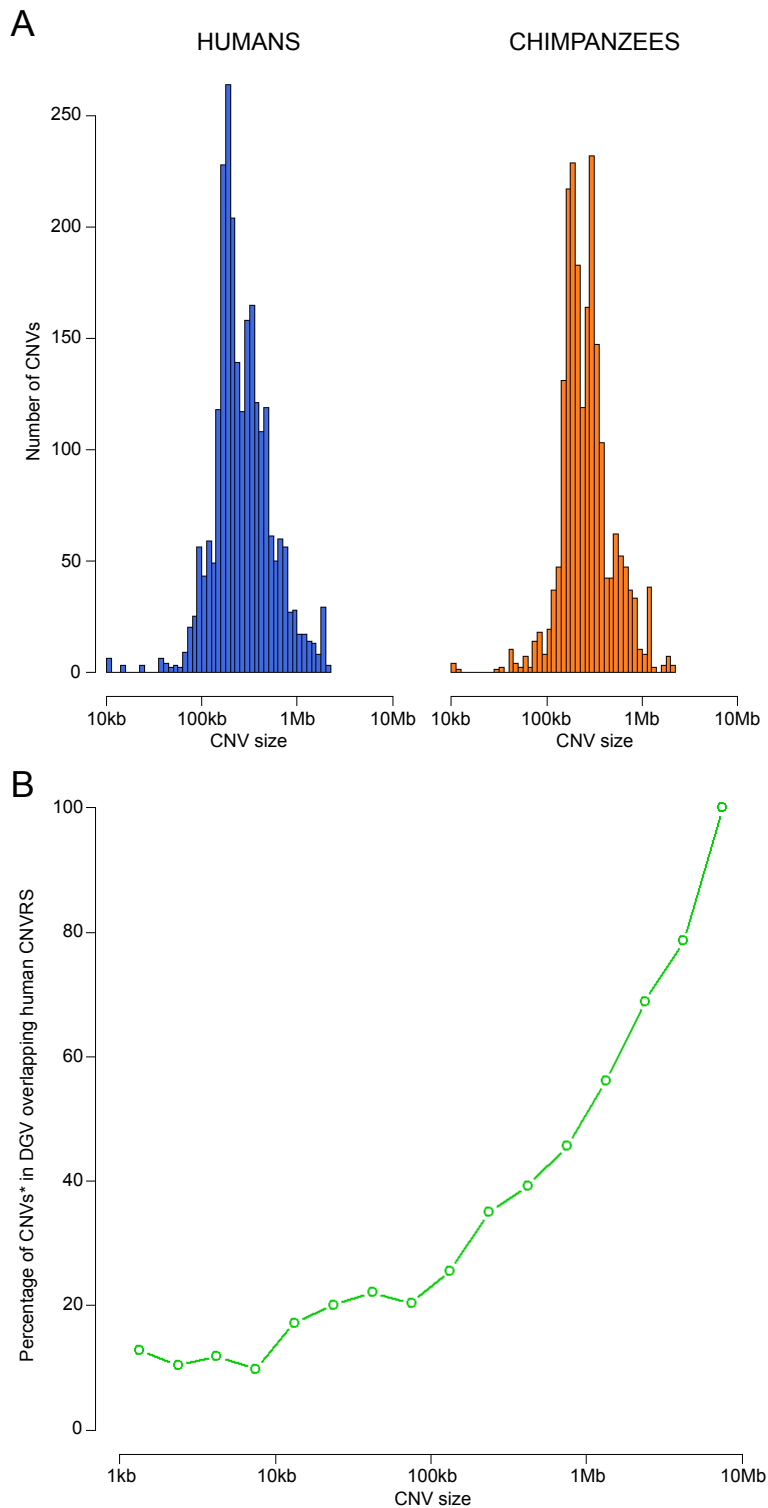

### Supplemental Figure 1: Size distribution of CNVs detected on the WGT platform

(A) Size distribution of CNVs detected for the 30 human individuals versus NA10851 (left panel in blue; median size = 246kb) and the 30 chimpanzee individuals versus Clint (left panel in orange; median size = 250kb). (B) Percentage of CNVs from the Database of Genomic Variants (DGV) that overlap one human CNVR from this study, in relation to their size. Many of the DGV large-scale CNVs (size > 100kb) overlap human CNVRs from this study. In contrast, only few if any small-scale CNVs (size < 10kb) can be detected on the WGT platform.

*\* to avoid systematic overestimation of CNV size in the DGV dataset, we excluded every CNV previously identified by aCGH on BAC microarray from the analysis.*
